# Supplementary material for: A web of streamers: biofilm formation in a porous microfluidic device
Source: Royal Society of Chemistry journal article supplement (doi:10.1039/c2lc40815e), 2012-01-01
Supplement: c2lc40815e.pdf [file c2lc40815e.pdf]

## Supplementary Information for

### **“A web of streamers: biofilm formation in a porous microfluidic device”**

Amin Valiei<sup>†</sup>, Alope Kumar<sup>\*‡</sup>, Partha P. Mukherjee<sup>‡</sup>, Yang Liu<sup>€</sup>, and Thomas Thundat<sup>\*†</sup>

<sup>†</sup>Department of Chemical and Materials Engineering, University of Alberta, Edmonton, AB,  
Canada T6G 2V4

<sup>‡</sup>Biosciences Division, Oak Ridge National Laboratory, Oak Ridge, TN, USA 37831

<sup>‡</sup>Department of Mechanical Engineering, Texas A & M University, College Station, TX, USA  
77843

<sup>€</sup>Department of Civil and Environmental Engineering, University of Alberta, Edmonton, AB,  
Canada T6G 2W2

\*Author email: kumara1@ornl.gov

\*Author email: thundat@ualberta.ca

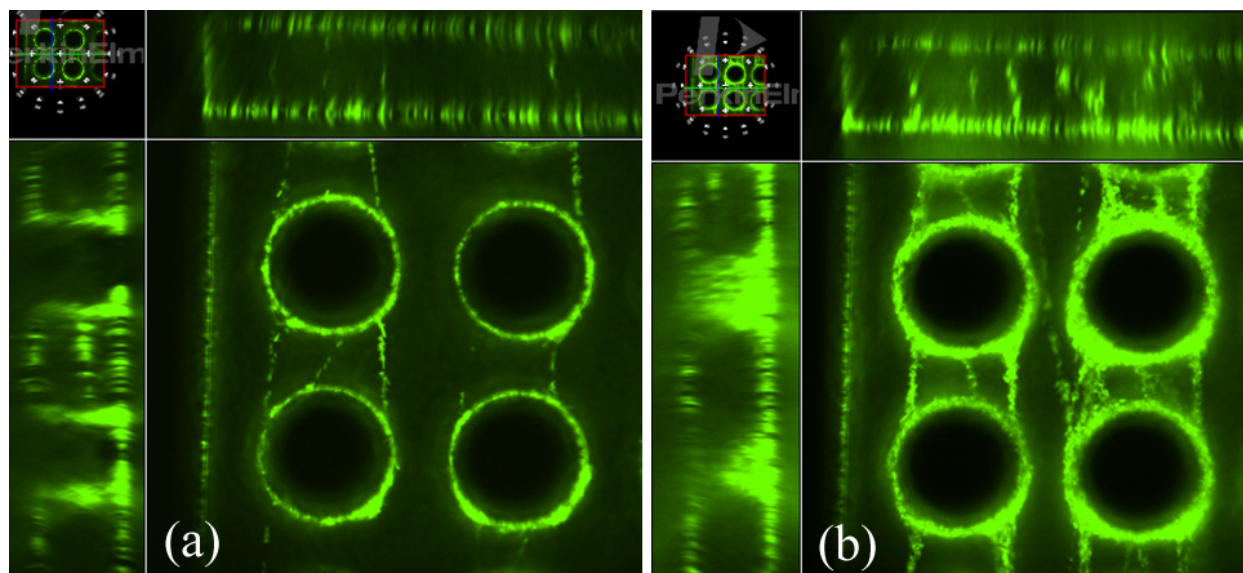

**Fig. S1.** Streamer formation for the mutant ( $\Delta$ gacS mutant –WS) after 15 hour of experiment, (a) for row 25 (b) for row 7.

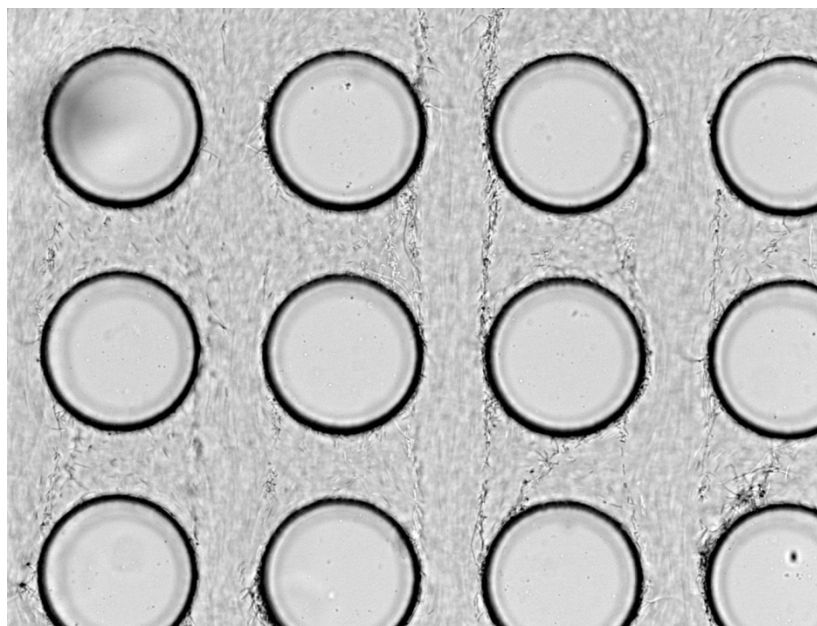

**Fig. S2.** Streamers can attach themselves to several posts.

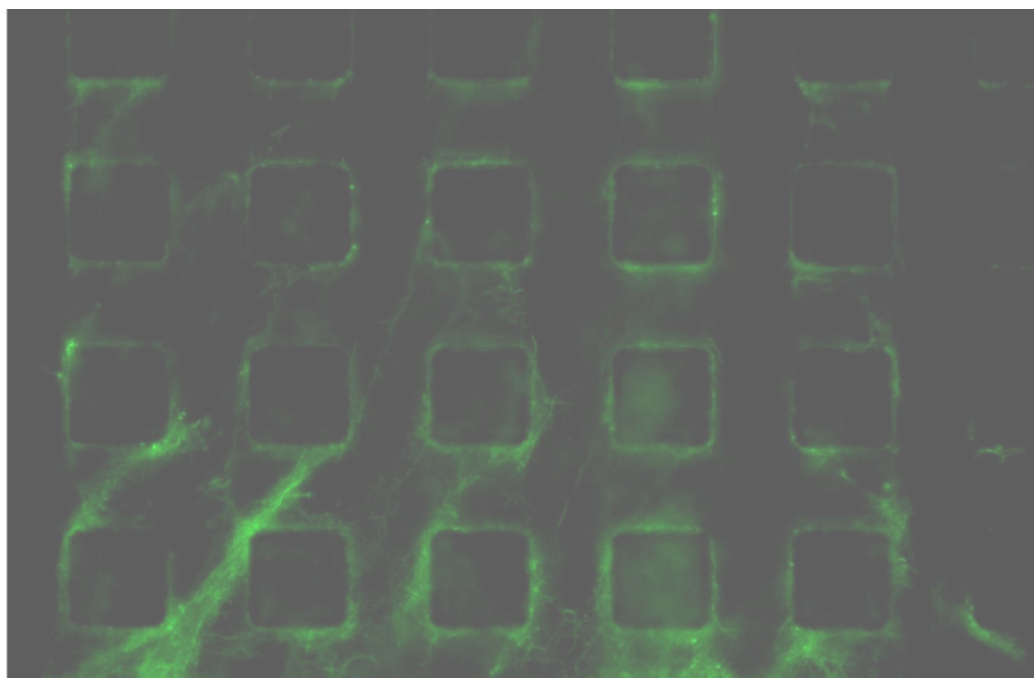

**Fig. S3.** Streamer formation between the square shaped microposts.

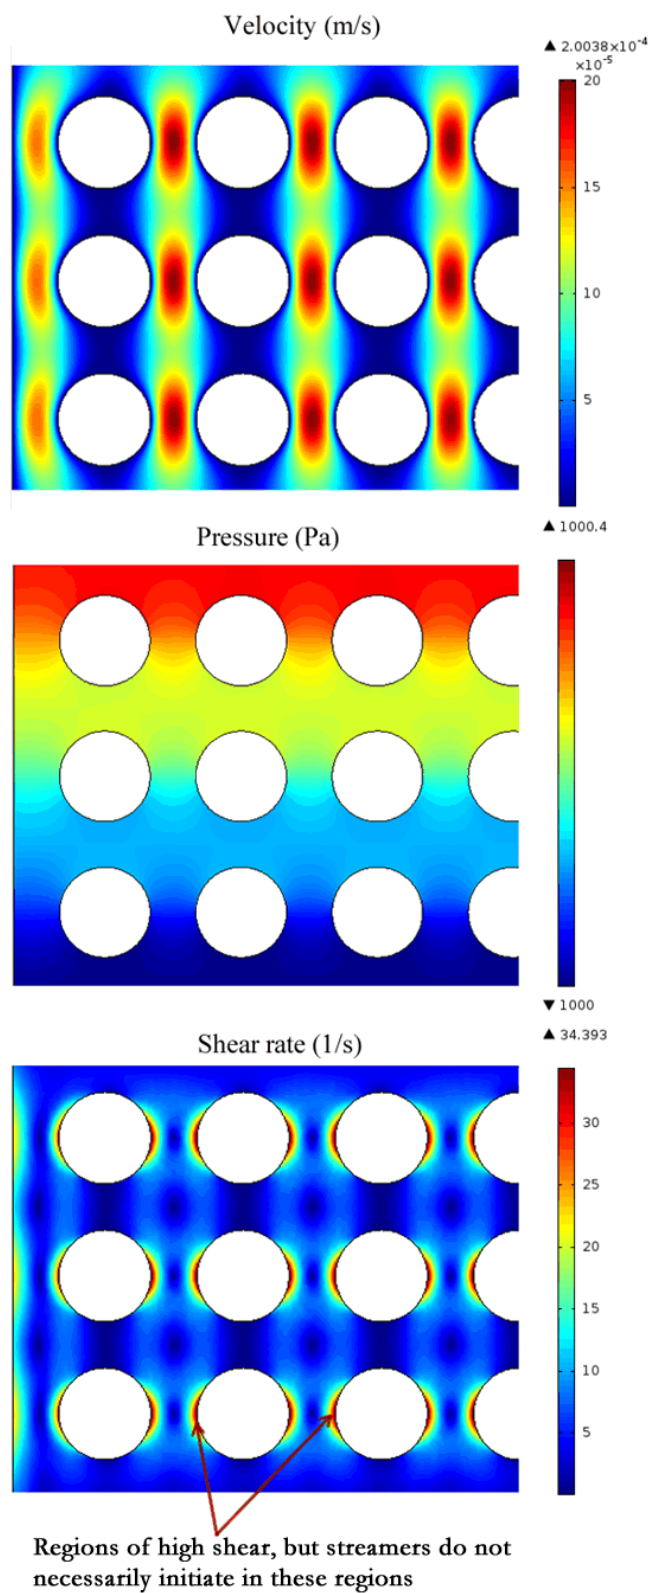

**Fig. S4.** Velocity, pressure and shear rate at the  $xy$  plane located in the middle of the device.
